# Supplementary material for: A simple strategy for converting starch to novel compressible carbonaceous foam: mechanism, enlightenment and potential application
Source: Royal Society of Chemistry journal article supplement (doi:10.1039/c8ra06741d), 2018-01-01
Supplement: c8ra06741d1.pdf [file c8ra06741d1.pdf]

**Supplementary material for:**

**A simple strategy for converting starch to novel  
compressible carbonaceous foam: mechanism,  
enlightenment and potential application**

Hong Lei <sup>a, \*</sup>, Yao Wu <sup>a</sup>, Sen Yang <sup>a</sup>, Chunfang Fu <sup>a</sup>, Jichuan Huo <sup>a, \*</sup>

<sup>a</sup> State Key Laboratory for Environment-friendly Energy Materials, School of Materials Science and Engineering, Southwest University of Science and Technology, Mianyang 621010, People's Republic of China

\* Corresponding author. Tel: + 86 816 2419201. Fax: + 86 816 2419201. E-mail:  
honglei117@163.com (H. Lei); huojichuan@swust.edu.cn (J. Huo).

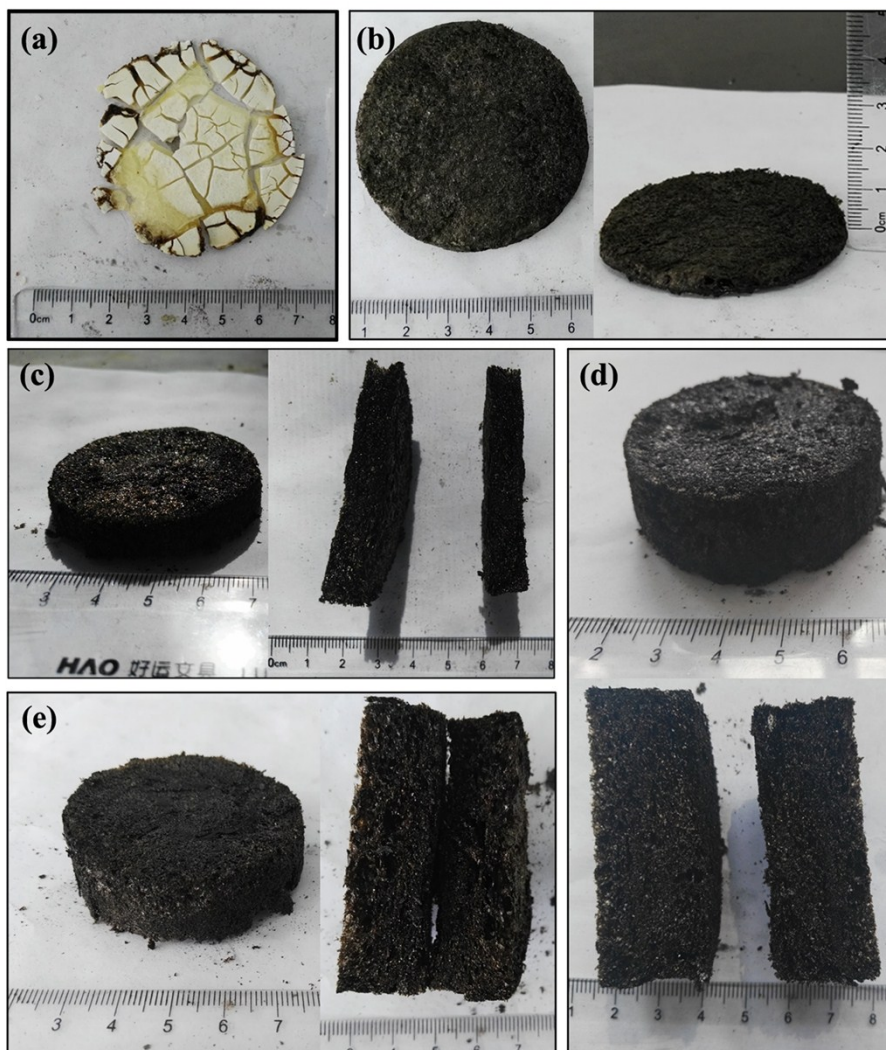

**Figure S1.** Digital images of the samples during the transition from starch to carbonaceous foam: (a) 45 min, (b) 55 min, (c) 1 h, (d) 2 h and (e) 3 h.

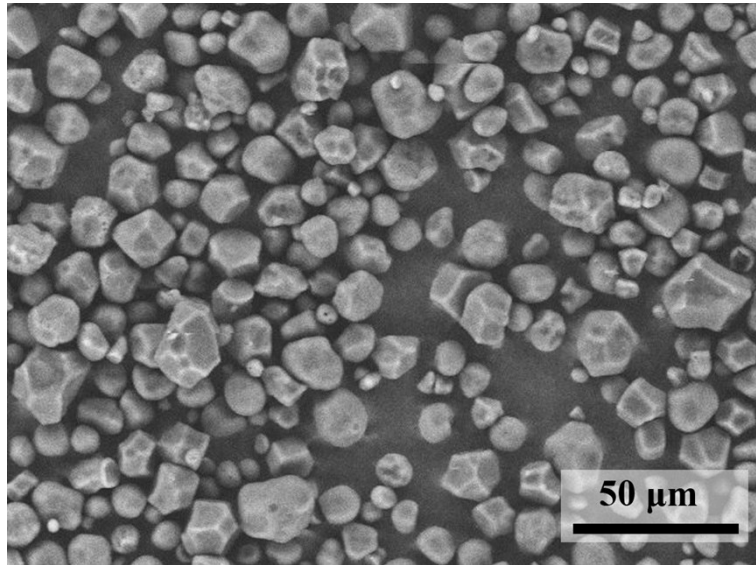

**Figure S2.** SEM image of native corn starch.

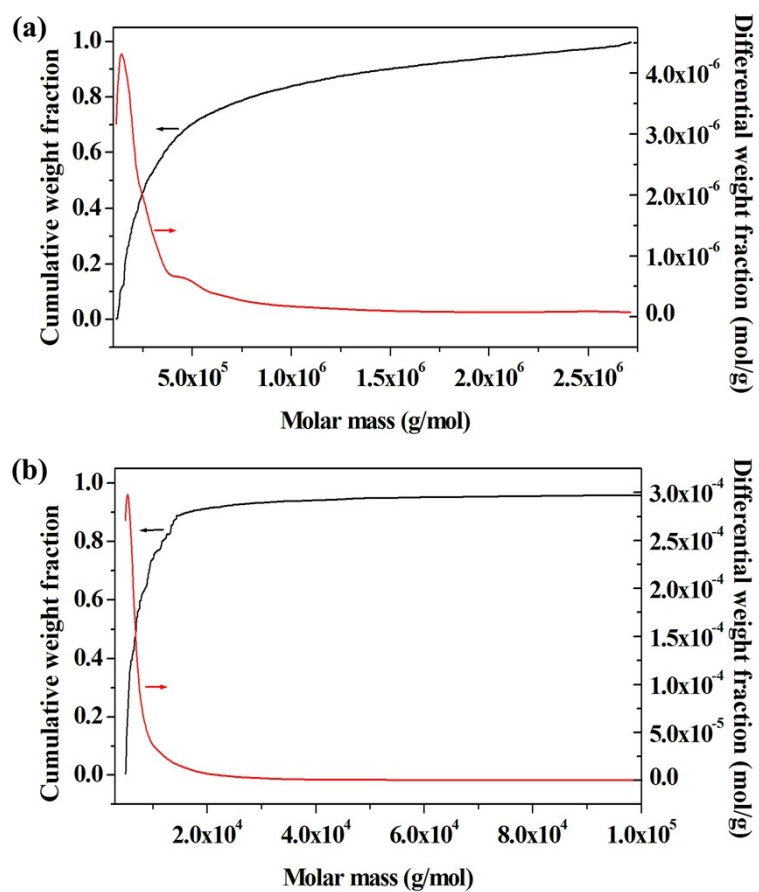

**Figure S3.** The molecular weight distributions of (a) the native corn starch and (b) the dark brown glutinous intermediate formed during the preparation of carbonaceous foam.

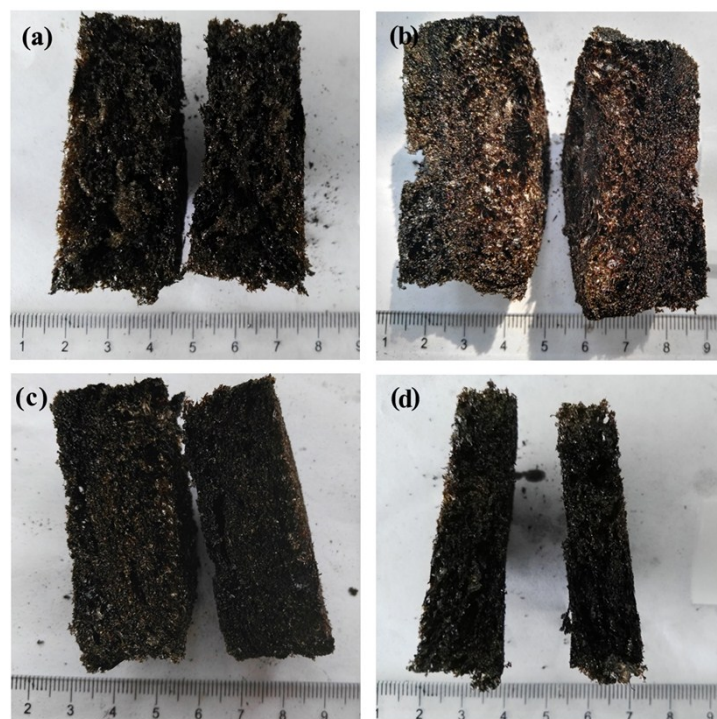

**Figure S4.** Digital images of the carbonaceous products prepared from the starch filter cakes that were hydrolytically etched by acid mixture for (a) 0 h, (b) 1 h, (c) 2 h and (d) 3 h.
